# Supplementary material
Source: PubMed Central journal article supplement (PMC8023828)
Supplement: djaa168_supplementary_data.pdf [file djaa168_supplementary_data.pdf]

Supplementary Material

Supplementary Table 1. Summary of Quality Assessment of Cohort Studies using the Newcastle-Ottawa Scale (NOS)

| STUDY, YEAR            | SELECTION                                |                                     |                           |                                                                          | COMPARABILITY                                                   | OUTCOMES              |                                                  |                                  | Total |
|------------------------|------------------------------------------|-------------------------------------|---------------------------|--------------------------------------------------------------------------|-----------------------------------------------------------------|-----------------------|--------------------------------------------------|----------------------------------|-------|
|                        | REPRESENTATIVENESS OF THE EXPOSED COHORT | SELECTION OF THE NON-EXPOSED COHORT | ASCERTAINMENT OF EXPOSURE | DEMONSTRATION THAT OUTCOME OF INTEREST WAS NOT PRESENT AT START OF STUDY | COMPARABILITY OF COHORTS ON THE BASIS OF THE DESIGN OR ANALYSIS | ASSESSMENT OF OUTCOME | WAS FOLLOW-UP LONG ENOUGH FOR OUTCOMES TO OCCUR? | ADEQUACY OF FOLLOW UP OF COHORTS |       |
| Garassino et al., 2020 | *                                        | *                                   | *                         | *                                                                        | **                                                              | *                     | -                                                | *                                | 8     |
| Dai et al., 2020       | *                                        | *                                   | *                         | *                                                                        | *                                                               | *                     | *                                                | *                                | 9     |
| Liang et al., 2020     | *                                        | *                                   | *                         | *                                                                        | *                                                               | *                     | -                                                | *                                | 7     |
| Mehta et al., 2020     | *                                        | -                                   | *                         | *                                                                        | **                                                              | *                     | -                                                | *                                | 7     |
| Ma et al., 2020        | *                                        | *                                   | -                         | *                                                                        | -                                                               | *                     | -                                                | *                                | 5     |
| He et al., 2020        | *                                        | *                                   | *                         | *                                                                        | -                                                               | *                     | -                                                | *                                | 6     |
| Tian et al., 2020      | *                                        | *                                   | *                         | -                                                                        | **                                                              | *                     | -                                                | *                                | 7     |
| Yang et al., 2020      | *                                        | *                                   | *                         | *                                                                        | **                                                              | *                     | *                                                | *                                | 9     |
| Kuderer et al., 2020   | *                                        | *                                   | *                         | *                                                                        | **                                                              | *                     | -                                                | *                                | 8     |
| Lee et al., 2020       | *                                        | *                                   | *                         | *                                                                        | **                                                              | *                     | -                                                | *                                | 8     |

Supplementary Table 2. Univariate model of factors associated with outcomes in patients with active tumor

| No. = 86               | Univariate Logistic Regression Analysis |              |         |
|------------------------|-----------------------------------------|--------------|---------|
|                        | Odds Ratio                              | 95% CI       | P Value |
| Treatment vs No        | 0.792                                   | 0.317-1.976  | 0.617   |
| Chemotherapy vs No     | 0.76                                    | 0.264-2.186  | 0.611   |
| Immunotherapy vs No    | 3.231                                   | 0.551-18.956 | 0.194   |
| Targeted Therapy vs No | 0.308                                   | 0.054-1.759  | 0.185   |
| Radiotherapy vs No     | 0.449                                   | 0.124-1.975  | 0.223   |
| Surgery vs No          | 0.808                                   | 0.220-2.964  | 0.747   |

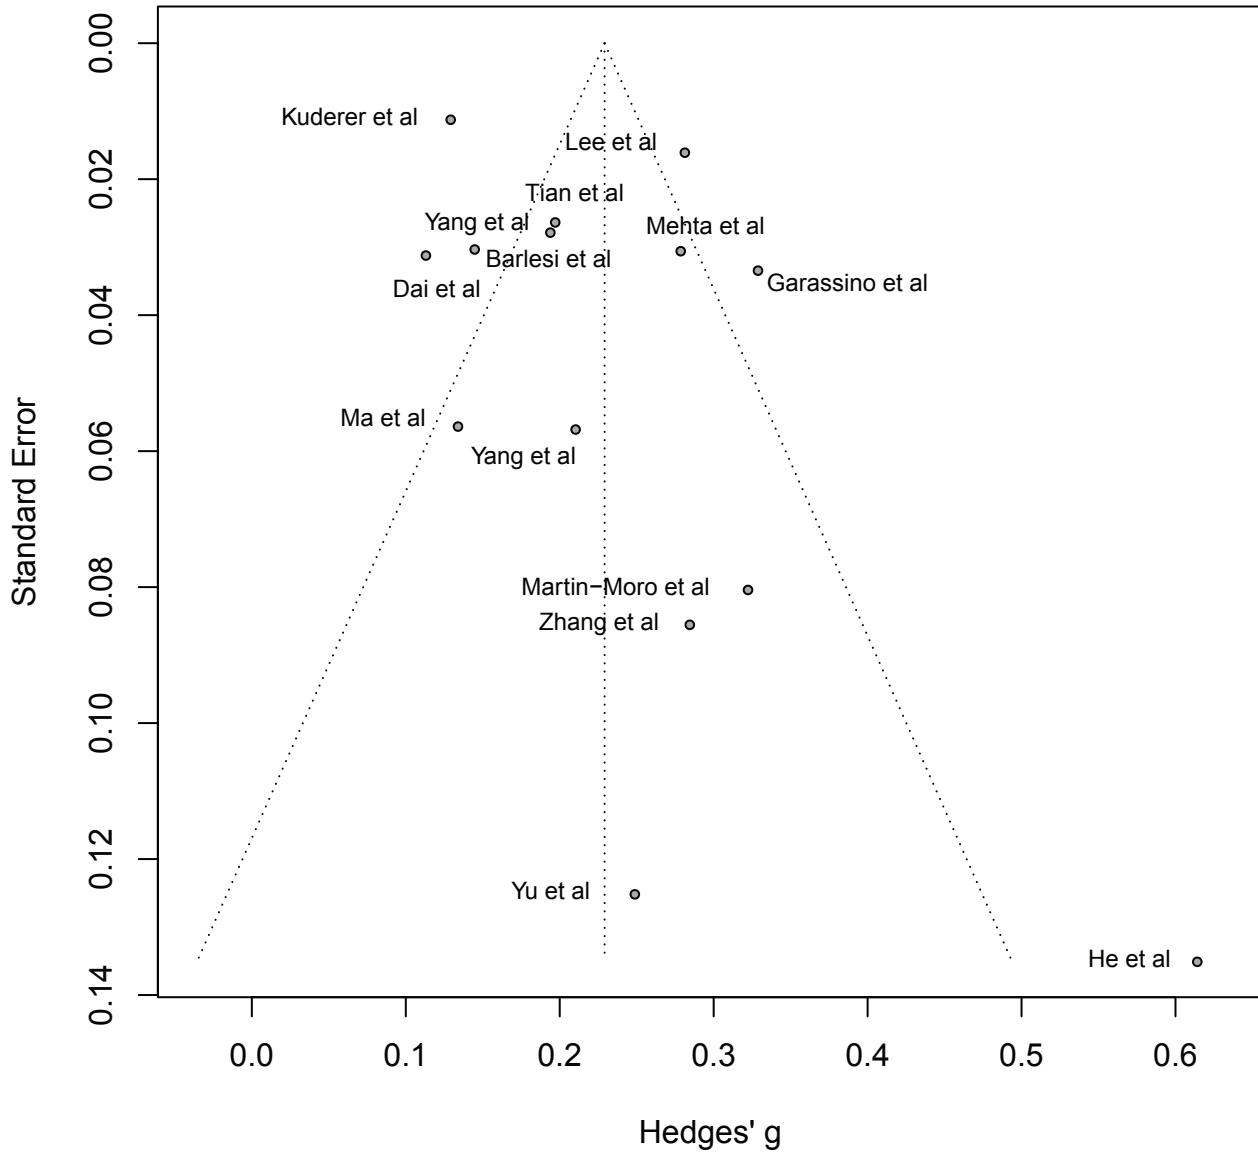

Supplementary Figure 1. Funnel plot and Egger's test showed no publication bias in the overall population ( $P = 0.17$ ).

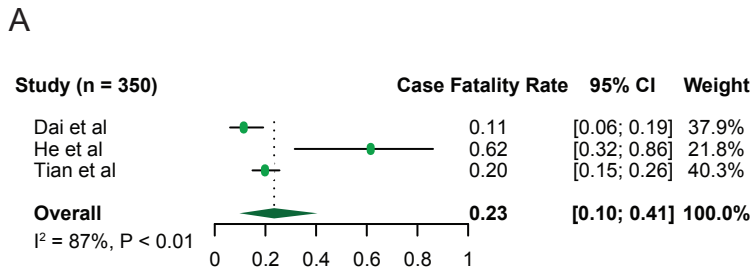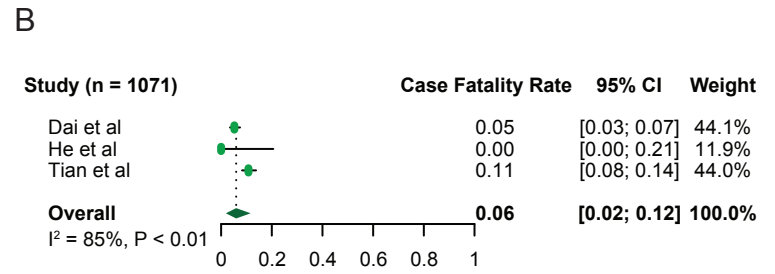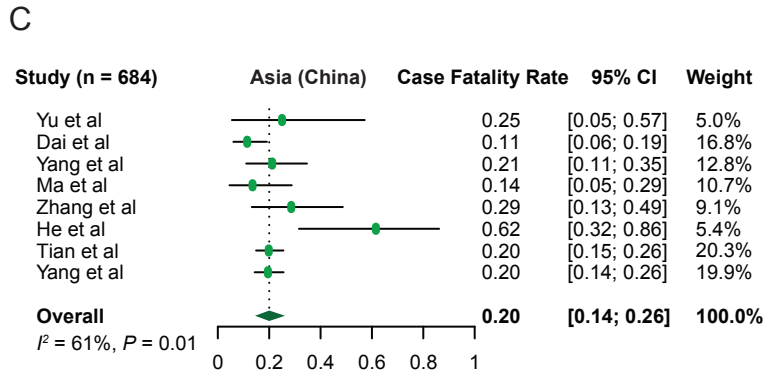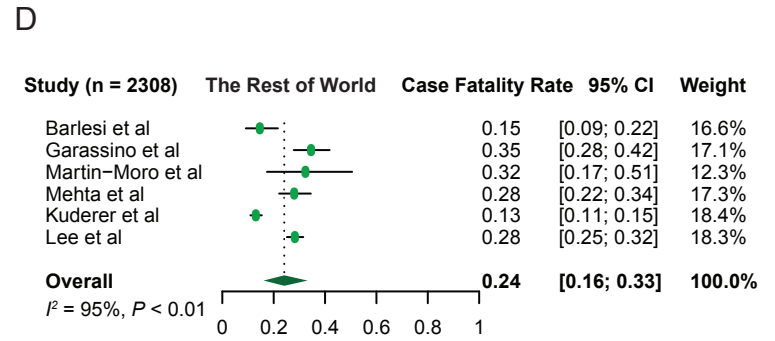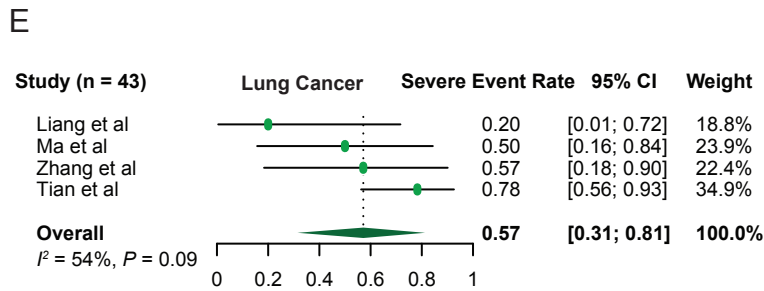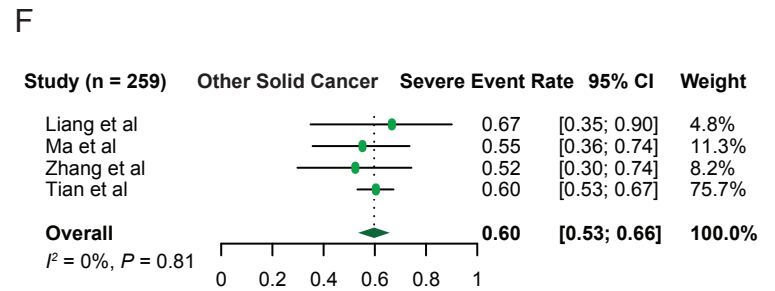

Supplementary Figure 2. Forest plot of case fatality rate in cancer patients with COVID-19 (A) and in COVID-19 patients without cancer (B) in three studies as indicated; Forest plot of case fatality rate in Asia (C) or the rest of the world (D), and the severe event rate in lung cancer patients with COVID-19 (E) or other solid cancer with COVID-19 (F).

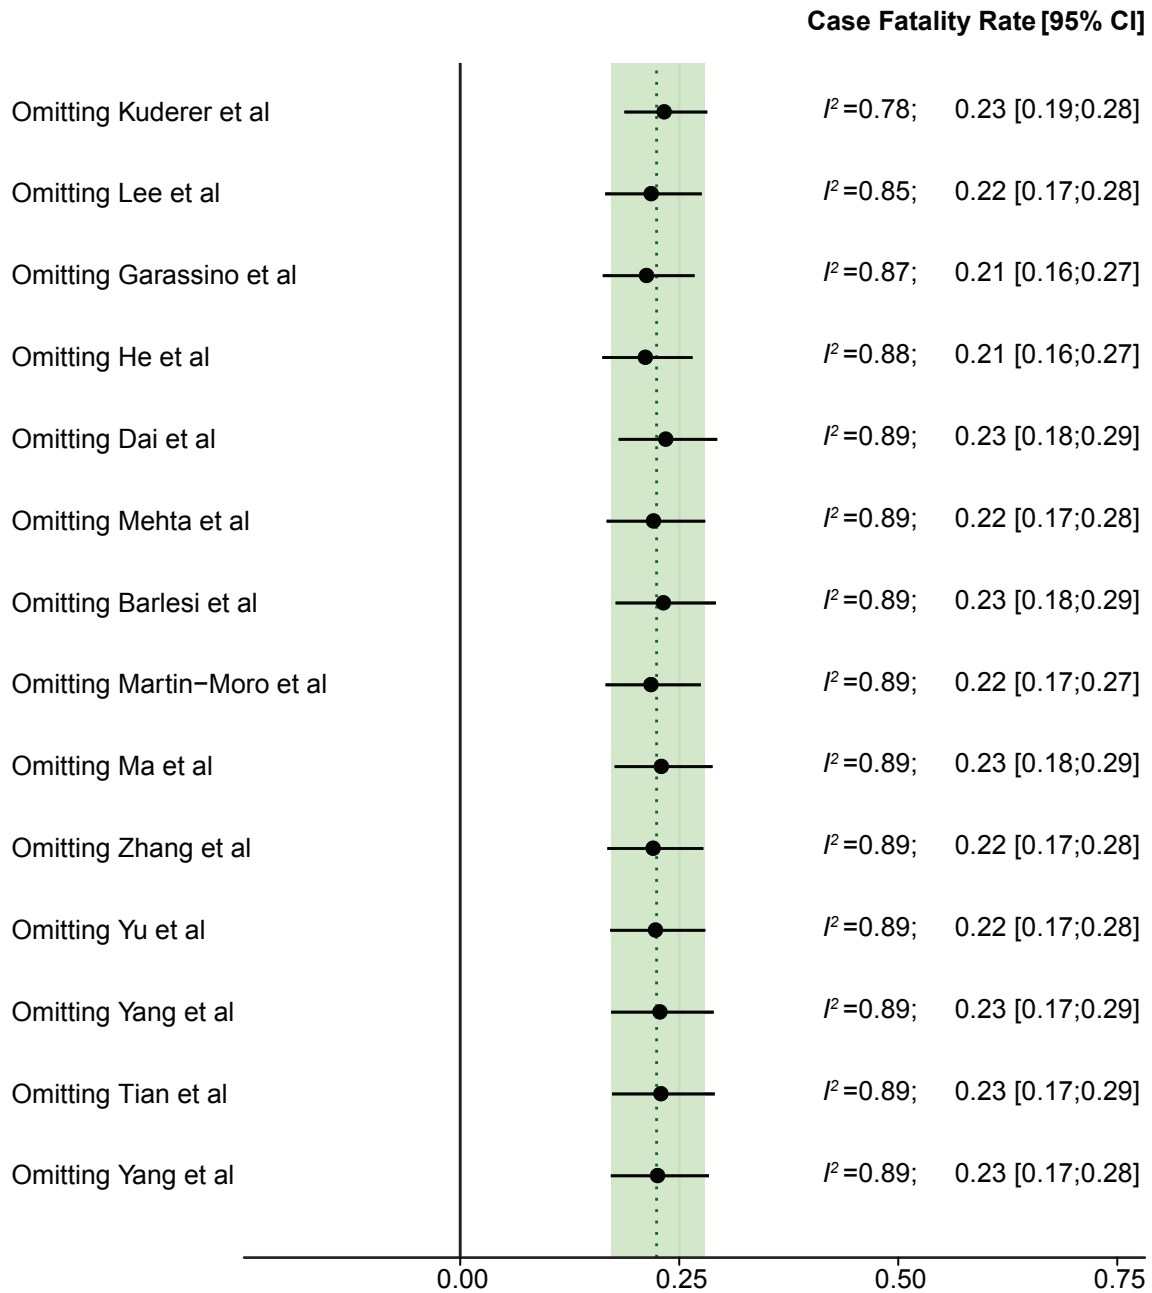

Supplementary Figure 3. The sensitivity analysis was performed using 'leave-one-out' per study per time approach. Case fatality rate of COVID-19 patients with cancer was shown here.
